# Supplementary material for: Antisense Oligonucleotides Conjugated with Lipophilic Compounds: Synthesis and In Vitro Evaluation of Exon Skipping in Duchenne Muscular Dystrophy
Source: MDPI journal article supplement (doi:10.3390/ijms23084270), 2022-04-12
Supplement: s1 [file s1]

# Antisense Oligonucleotides Conjugated with Lipophilic Compounds: Synthesis and in Vitro Evaluation of Exon Skipping in Duchenne Muscular Dystrophy

Elena Marchesi<sup>1</sup>, Rita Cortesi<sup>2</sup>, Lorenzo Preti<sup>2</sup>, Paola Rimessi<sup>3</sup>, Maddalena Sguizzato<sup>2</sup>, Matteo Bovolenta<sup>4,\*</sup> and Daniela Perrone<sup>1,\*</sup>

<sup>1</sup> Department of Environmental and Prevention Sciences, University of Ferrara, 44121 Ferrara, Italy; mrcine@unife.it

<sup>2</sup> Department of Chemical, Pharmaceutical and Agricultural Sciences, University of Ferrara, 44121 Ferrara, Italy; crt@unife.it (R.C.); prtlnz@unife.it (L.P.) and sgzmdl@unife.it (M.S.)

<sup>3</sup> Unit of Medical Genetics, S. Anna University-Hospital, Ferrara, Italy; rsp@unife.it

<sup>4</sup> Department of Translational Medicine, University of Ferrara, 44121 Ferrara, Italy.

\* Correspondence: prd@unife.it (D.P.); bvlmtt@unife.it (M.B.)

**Table S1.** L-ASO conjugates: reaction conditions for formation of amide bond and ESI-MS analyses

| L (ASO 51) <sup>a</sup> | Conditions <sup>b</sup>                                                                                                                                | Efficiency <sup>c</sup><br>(%) <sup>c</sup> | Molecular Mass, Da <sup>d</sup> |          |
|-------------------------|--------------------------------------------------------------------------------------------------------------------------------------------------------|---------------------------------------------|---------------------------------|----------|
|                         |                                                                                                                                                        |                                             | Calc.[M]                        | Exp. [M] |
| 5'-UDC                  | 1 (10 eq.), DIPEA (40 eq.) in DMSO (1 mL), 60 min.                                                                                                     | 83                                          | 7633.66                         | 7631.84  |
| 5'-HDC                  | 2 (10 eq.), DIPEA (40 eq.) in DMSO (1 mL), 60 min.                                                                                                     | 81                                          | 7633.66                         | 7632.64  |
| 5'-DH                   | 3 (10 eq.), DIPEA (40 eq.) in DMSO (1 mL), 60 min                                                                                                      | 52                                          | 7570.35                         | 7566.24  |
| 5'-EP                   | 4 (10 eq.), DIPEA (40 eq.) in DMSO (1 mL), 60 min                                                                                                      | 53                                          | 7544.46                         | 7547.91  |
| 5'-N-UDC                | 8 (10 eq.), DIPEA (40 eq.) in DMSO (1 mL), 60 min.                                                                                                     | 20                                          | 7733.70                         | 7735.95  |
| 5'-DH-N-UDC             | 10 (10 eq.), DIPEA (40 eq.) in DMSO (1 mL), 60 min.                                                                                                    | 15                                          | 7943.50                         | 7946.4   |
| 5'-N-TUDCA              | i) Succinic acid (20 eq.), HBTU (20 eq.), DIPEA (40 eq.) in DMF (1 mL), 40 min.; ii) 12 (20 eq.), HBTU (20 eq.), DIPEA (40 eq.) in DMF (1 mL), 40 min. | 62                                          | 7840.90                         | 7839.01  |
| 5'-UDC 68% PS           | 1 (10 eq.), DIPEA (40 eq.) in DMSO (1 mL), 60 min.                                                                                                     | 80                                          | 7521.10                         | 7521.08  |
| 5'-UDC 53% PS           | 1 (10 eq.), DIPEA (40 eq.) in DMSO (1 mL), 60 min.                                                                                                     | 79                                          | 7489.35                         | 7487.60  |
| 5'-UDC 42% end-PS       | 1 (10 eq.), DIPEA (40 eq.) in DMSO (1 mL), 60 min.                                                                                                     | 81                                          | 7457.25                         | 7457.78  |
| 5'-UDC 42% PS           | 1 (10 eq.), DIPEA (40 eq.) in DMSO (1 mL), 60 min.                                                                                                     | 80                                          | 7457.25                         | 7459.34  |
| 5'-UDC 32% PS           | 1 (10 eq.), DIPEA (40 eq.) in DMSO (1 mL), 60 min.                                                                                                     | 78                                          | 7425.15                         | 7427.92  |
| 5',3'-bis-UDC           | 1 (10 eq.), DIPEA (40 eq.) in DMSO (1 mL), 60 min.                                                                                                     | 68                                          | 8203.41                         | 8202.64  |

<sup>a</sup> All synthesized ASO 51 were full-length 2'-OMe and full-length PS unless stated otherwise and contained the following sequence: 5'-UCAAGGAAGAUGGCAUUUCU-3'. <sup>b</sup> All reactions were performed at 7  $\mu$ mol scale and room temperature by using ssH-ASO 51-S or ss-H-ASO 51 3'-UDC (in the case of 5',3'-bis-UDC ASO 51). <sup>c</sup> Calculated on UV areas measured at wavelength of 260 nm, of conjugated full-length sequences versus unconjugated ones including failures. <sup>d</sup> According to ESI-MS in the negative ions mode.

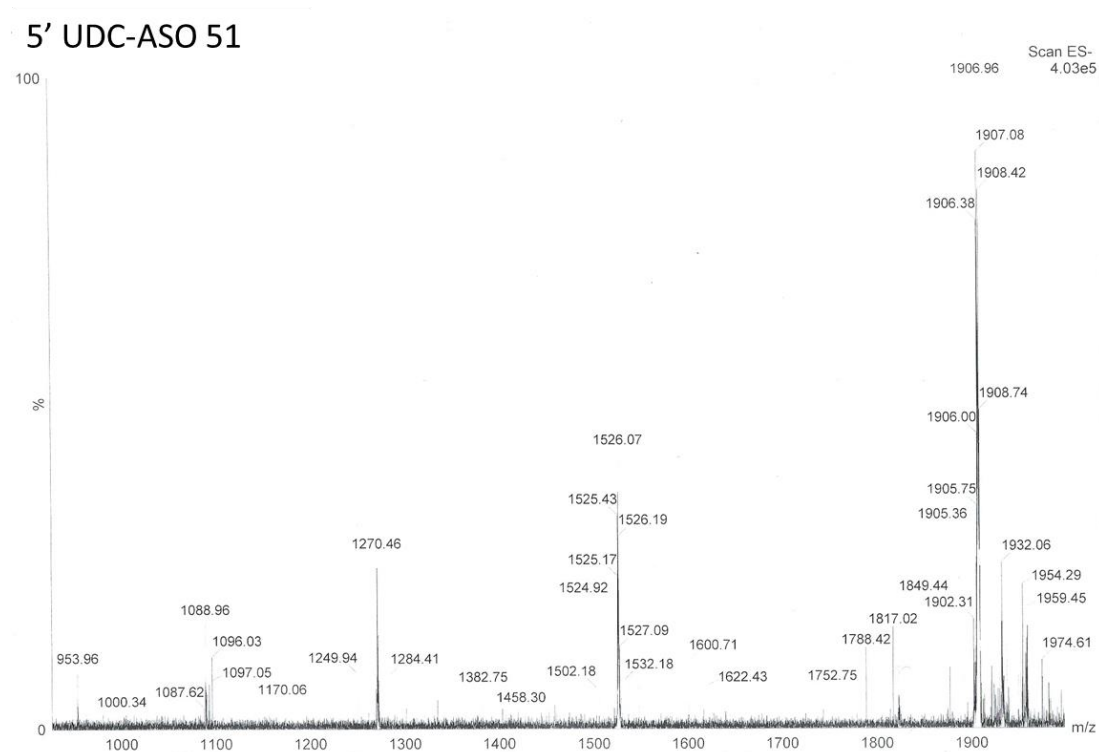

Figure S1: 5'-UDC-ASO 51 ESI-MS spectrum

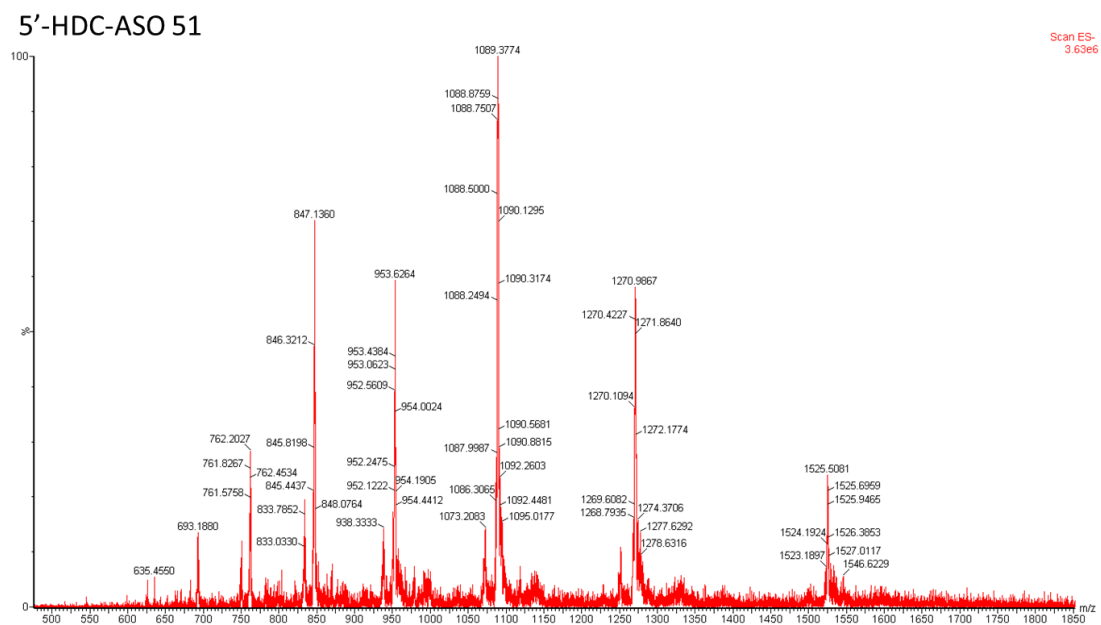

Figure S2: 5'-HDC-ASO 51 ESI-MS spectrum

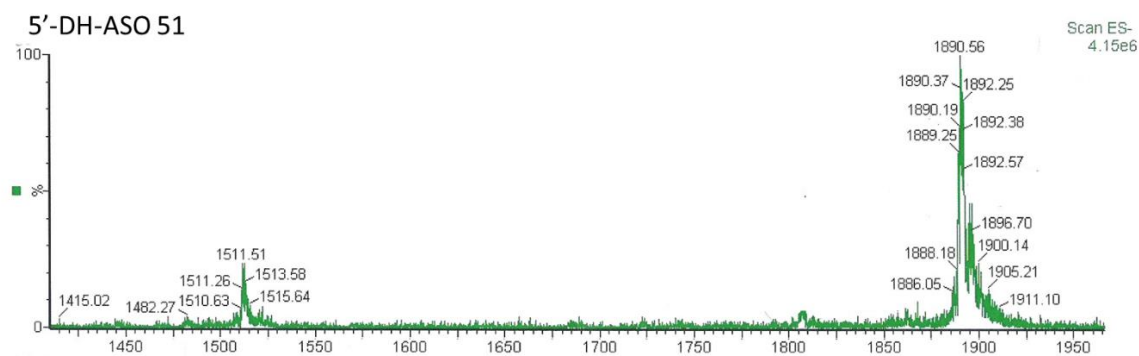

**Figure S3: 5'-DH-ASO 51 ESI-MS spectrum**

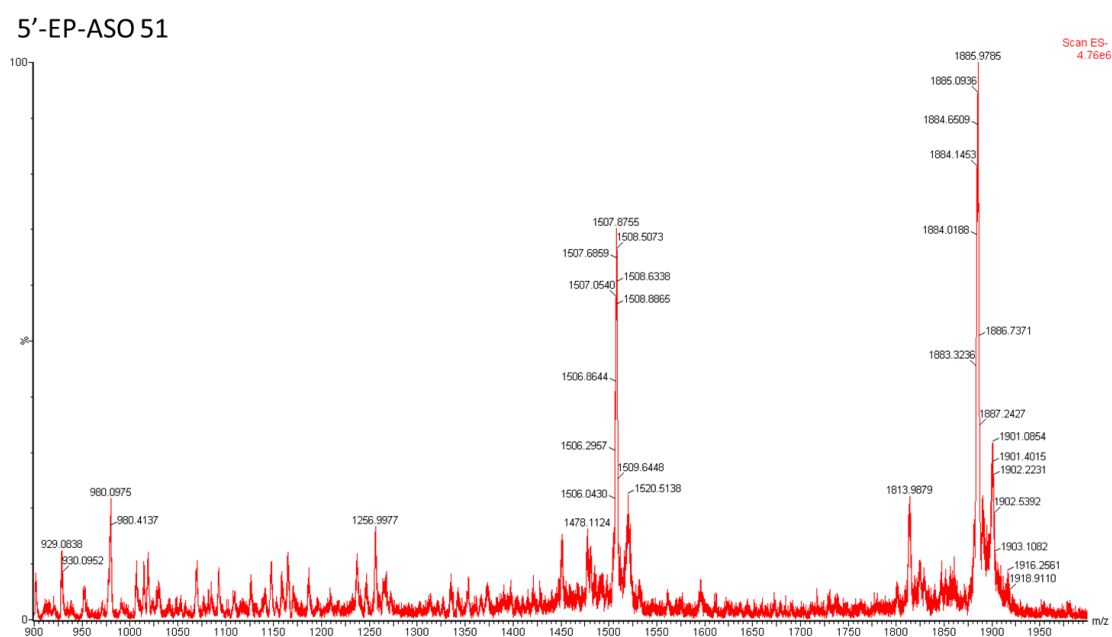

**Figure S4: 5'-EP-ASO 51 ESI-MS spectrum**

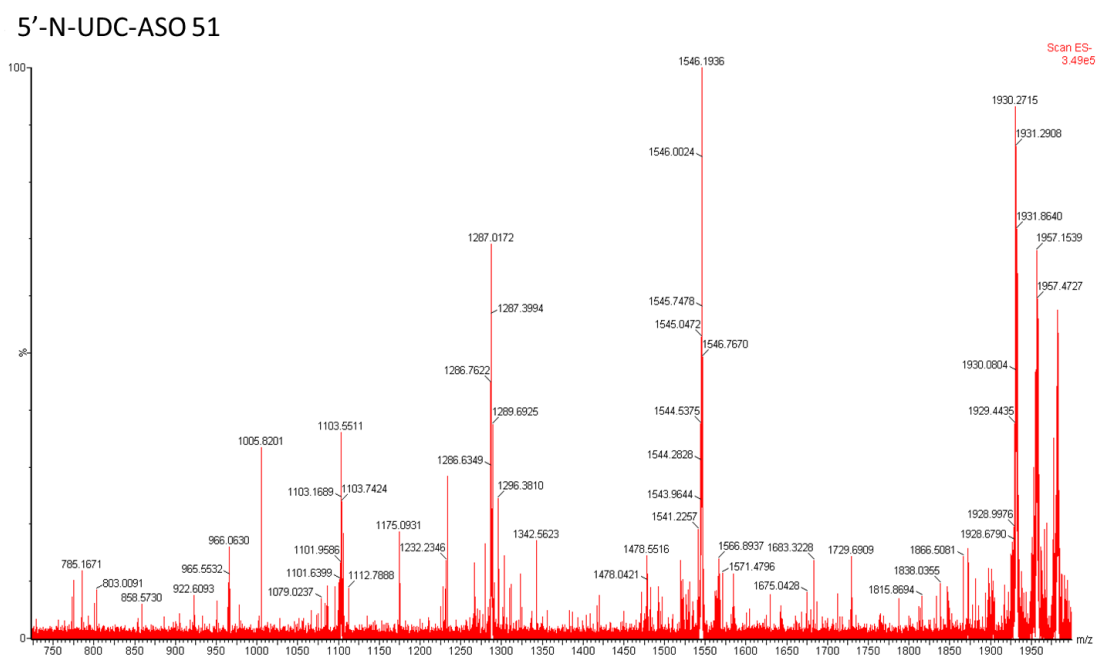

**Figure S5: 5'-N-UDC-ASO 51 ESI-MS spectrum**

5'-DH-N-UDC-ASO 51

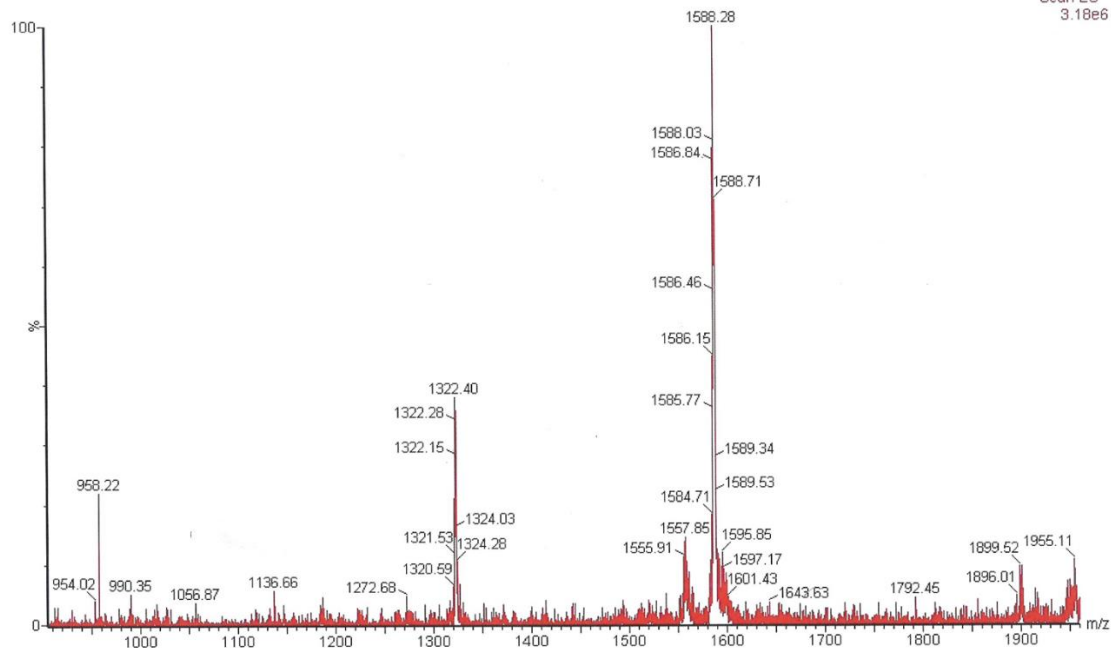

Figure S6: 5'-DH-N-UDC-ASO 51 ESI-MS spectrum

5'-N-TUDCA-ASO 51

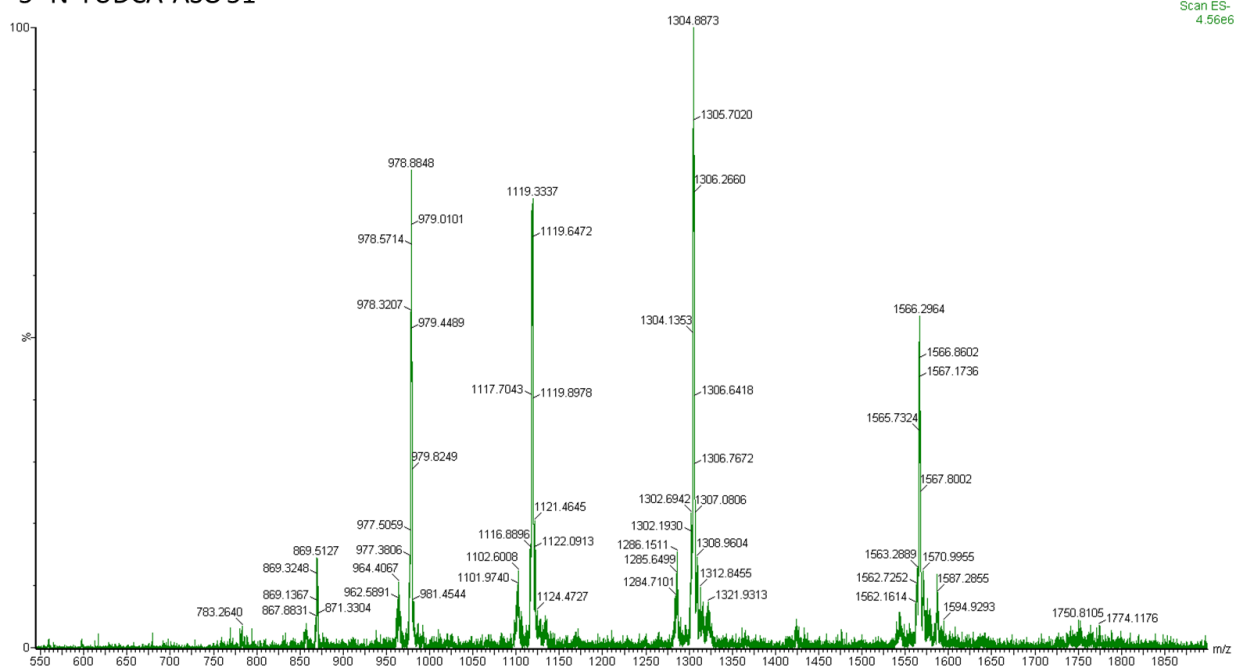

Figure S7: 5'-N-TUDCA-ASO 51 ESI-MS spectrum

### 5'-UDC-ASO 51-68% PS

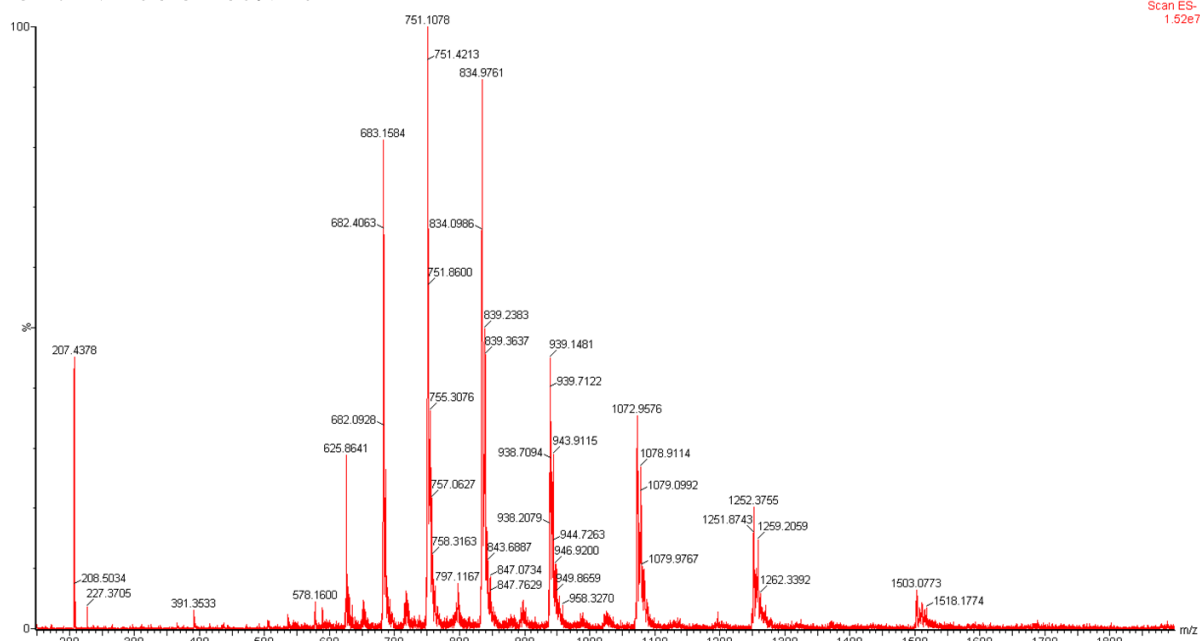

Figure S8: 5'-UDC-ASO 51-68% PS ESI-MS spectrum

### 5'-UDC-ASO 51-53% PS

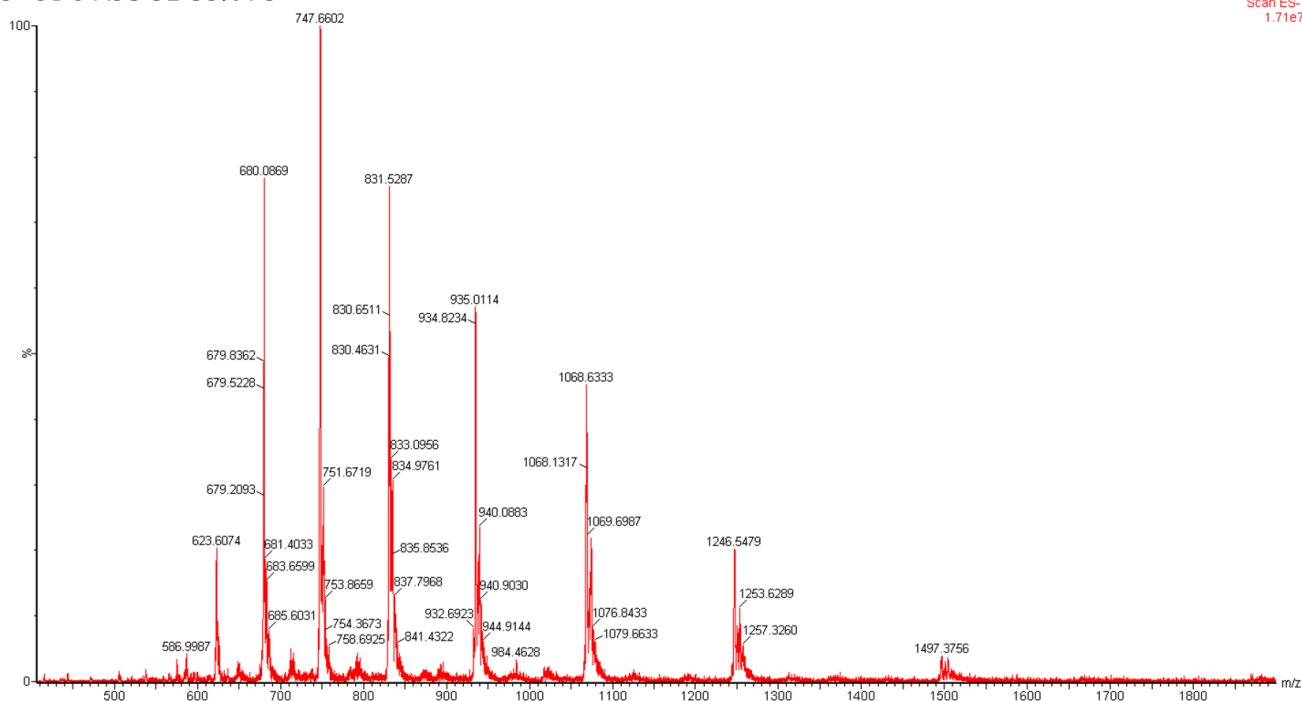

Figure S9: 5'-UDC-ASO 51-53% PS ESI-MS spectrum

# 5'-UDC-ASO 51-42% end-PS

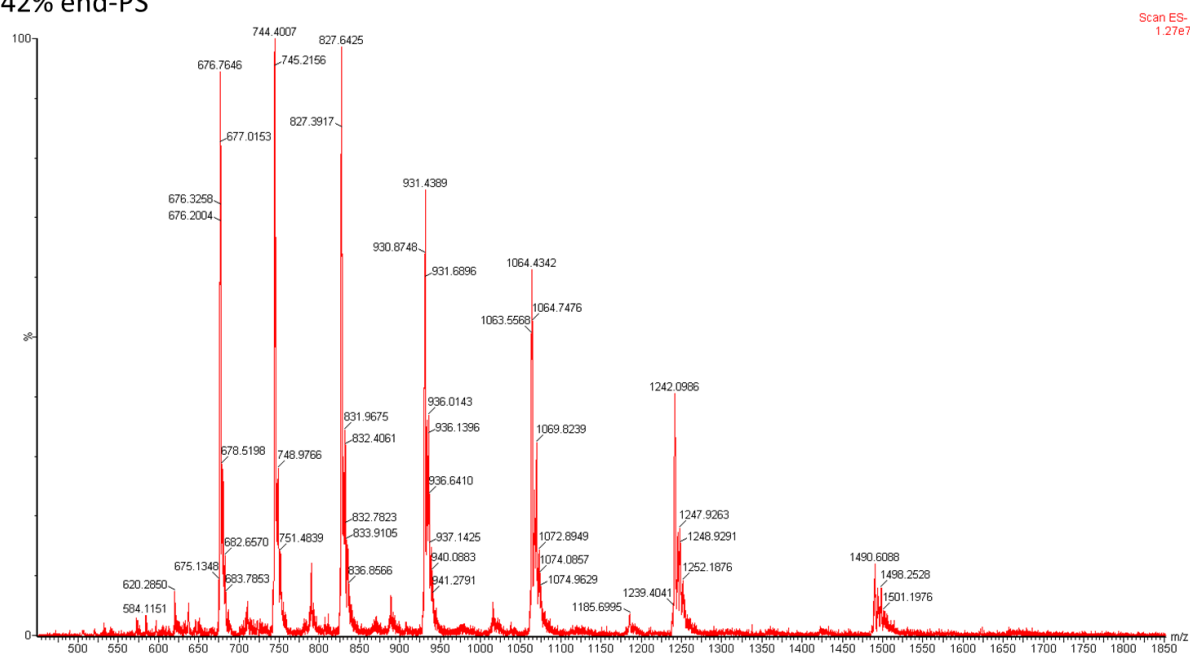

Figure S10: 5'-UDC-ASO 51-42% end-PS ESI-MS spectrum

# 5'-UDC-ASO 51-42% PS

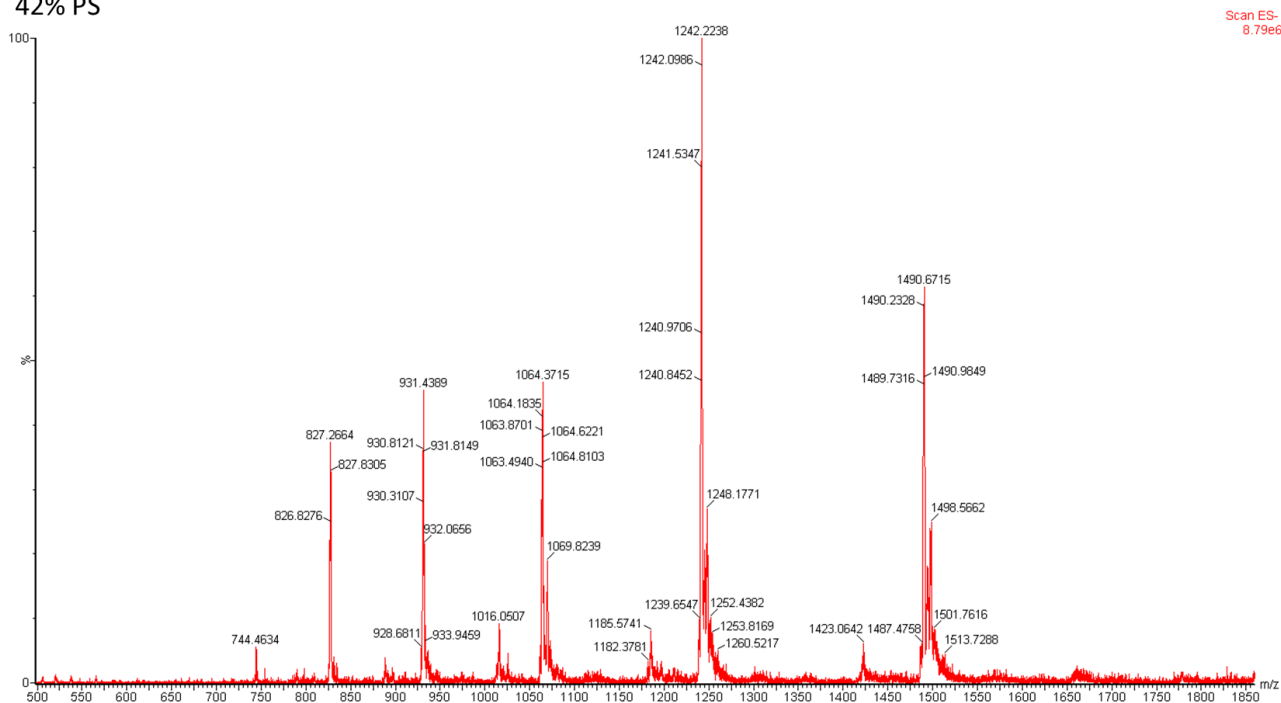

Figure S11: 5'-UDC-ASO 51-42% PS ESI-MS spectrum

Mass spectrum of compound 10. The x-axis represents the mass-to-charge ratio (m/z) from 500 to 1850, and the y-axis represents the relative intensity from 0 to 100%. The base peak is at m/z 824.4458. Other significant peaks are labeled with their m/z values.

| m/z       | Relative Intensity (%) |
|-----------|------------------------|
| 616.6493  | ~5                     |
| 617.6522  | ~15                    |
| 673.2543  | ~10                    |
| 674.0692  | ~25                    |
| 674.6334  | ~10                    |
| 674.3825  | ~10                    |
| 708.0442  | ~5                     |
| 739.3234  | ~5                     |
| 740.9532  | ~35                    |
| 741.7681  | ~45                    |
| 743.7112  | ~10                    |
| 744.7769  | ~10                    |
| 745.1530  | ~10                    |
| 745.9678  | ~10                    |
| 746.7200  | ~10                    |
| 823.0040  | ~10                    |
| 823.5682  | ~10                    |
| 823.9443  | ~10                    |
| 824.4458  | 100                    |
| 828.3947  | ~10                    |
| 828.7080  | ~10                    |
| 830.5885  | ~10                    |
| 830.7765  | ~10                    |
| 831.2780  | ~10                    |
| 832.0928  | ~10                    |
| 832.3163  | ~10                    |
| 832.5670  | ~10                    |
| 832.9214  | ~10                    |
| 833.0457  | ~10                    |
| 925.0457  | ~10                    |
| 926.1740  | ~10                    |
| 926.8634  | ~40                    |
| 926.5500  | ~10                    |
| 927.4902  | ~55                    |
| 931.6268  | ~10                    |
| 932.1284  | ~10                    |
| 932.0712  | ~10                    |
| 932.3163  | ~10                    |
| 932.5670  | ~10                    |
| 932.9195  | ~10                    |
| 935.5755  | ~10                    |
| 1058.7311 | ~10                    |
| 1058.8563 | ~10                    |
| 1059.7965 | ~10                    |
| 1065.8757 | ~10                    |
| 1066.4480 | ~10                    |
| 1068.0065 | ~10                    |
| 1068.7585 | ~10                    |
| 1069.0719 | ~10                    |
| 1235.5188 | ~10                    |
| 1236.2080 | ~10                    |
| 1239.6547 | ~10                    |
| 1243.1639 | ~10                    |
| 1245.9839 | ~10                    |
| 1246.6104 | ~10                    |
| 1249.3049 | ~10                    |
| 1236.5214 | ~15                    |
| 1490.6088 | ~5                     |
| 1491.6112 | ~10                    |
| 1492.3630 | ~10                    |

5',3'-bis-UDC-ASO 51

Scan ES-  
5.21e6

Mass spectrum showing relative intensity (%) versus mass-to-charge ratio ( $m/z$ ). The base peak is at  $m/z$  1170.8064. Other labeled peaks include:

- 784.3338
- 819.5353
- 820.1650
- 911.1558
- 1022.9808
- 1021.8475
- 1023.8623
- 1023.4215
- 1024.6179
- 1024.8069
- 1024.9957
- 1025.4993
- 1026.1919
- 1027.8289
- 1028.8475
- 1123.3380
- 1168.0907
- 1168.0995
- 1170.4918
- 1170.5111
- 1170.6178
- 1170.8064
- 1171.2472
- 1171.4360
- 1171.6879
- 1170.2400
- 1174.2062
- 1227.0238
- 1283.0500
- 1363.9362
- 1366.6450
- 1365.5121
- 1365.9525
- 1366.1414
- 1367.6523
- 1370.0441
- 1373.8210
- 1432.2974
- 1496.9410
- 1639.4437
- 1639.8844
- 1639.1289
- 1640.1991
- 1640.6395
- 1641.0172
- 1643.7239
- 1717.9973
- 1737.7618
- 1797.1199

**Figure S13: 5',3'-bis-UDC-ASO 51 ESI-MS spectrum**

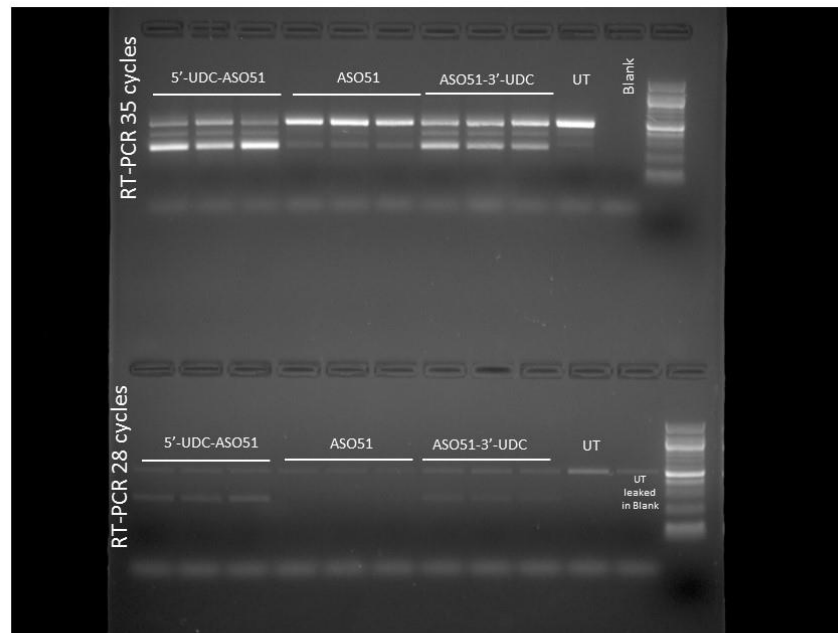

**Figure S14:** Original images for RT-PCRs performed with primers DMDex50F and DMDex54R
